# Supplementary material for: Deconstruction of rheumatoid arthritis synovium defines inflammatory subtypes
Source: PubMed Central journal article supplement (PMC10651487; doi:10.1038/s41586-023-06708-y), 2023-11-08
Supplement: 41586_2023_6708_MOESM3_ESM.pdf [file 41586_2023_6708_MOESM3_ESM.pdf]

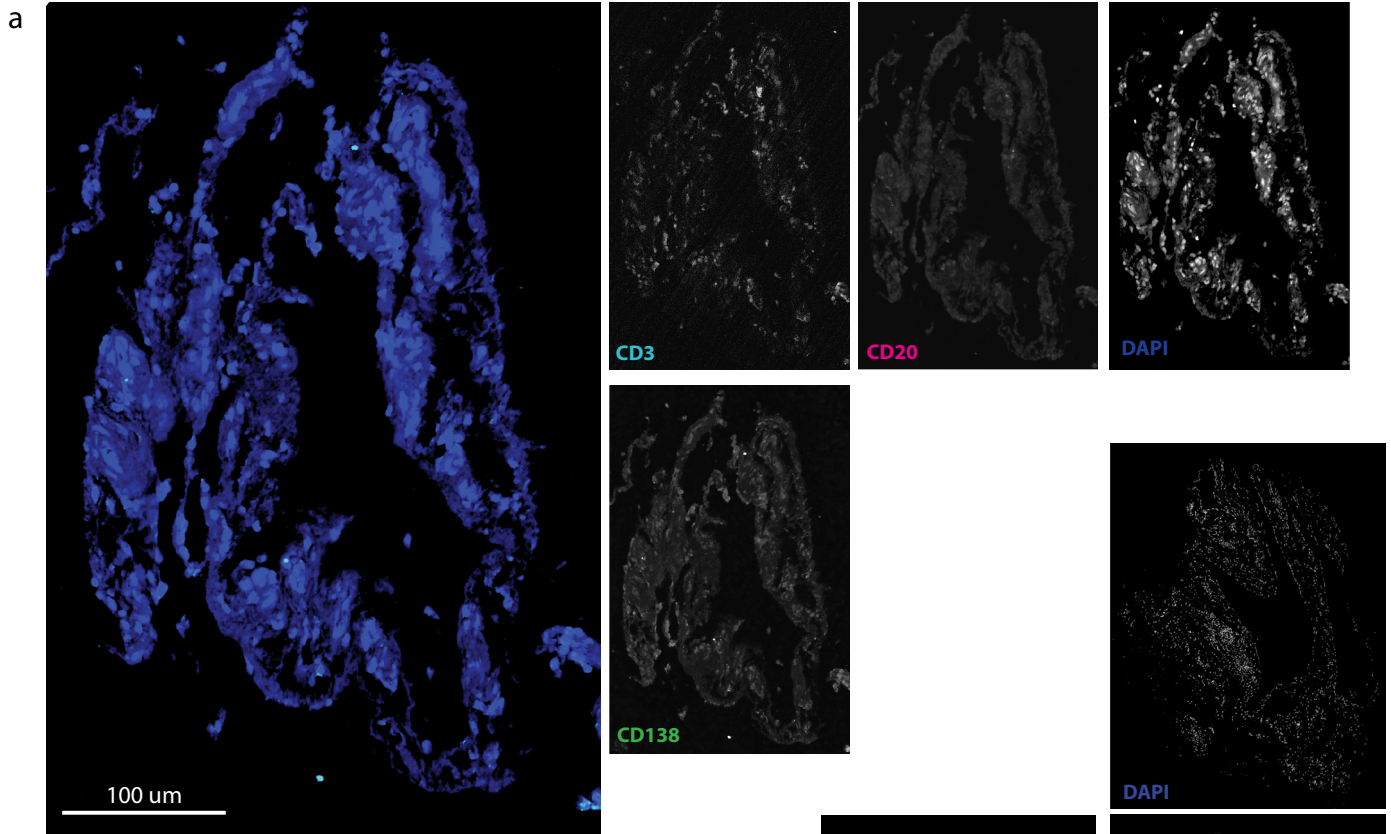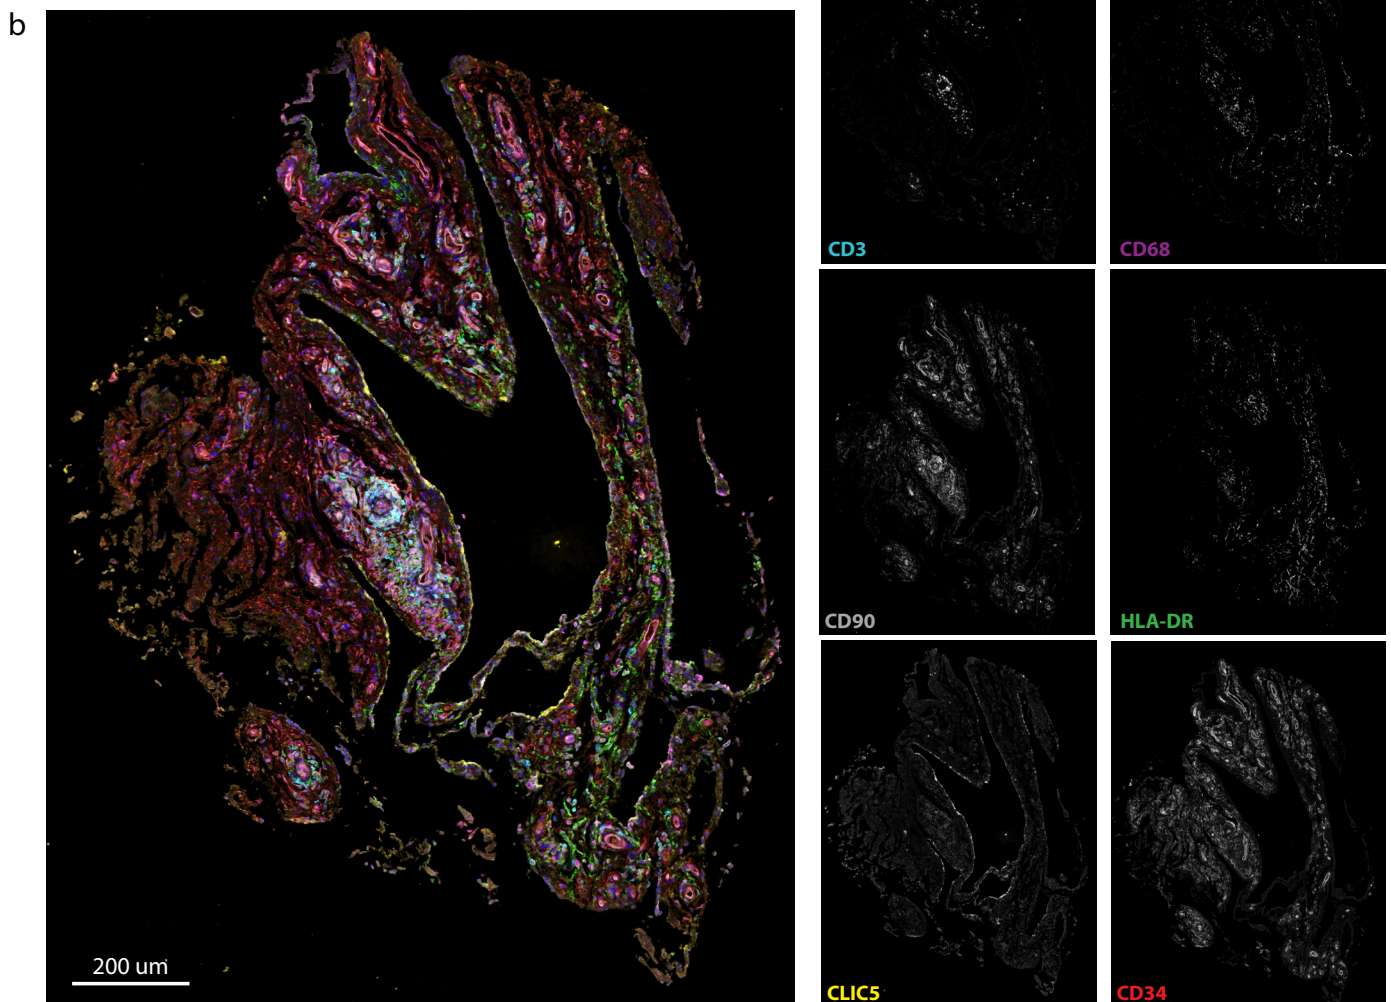

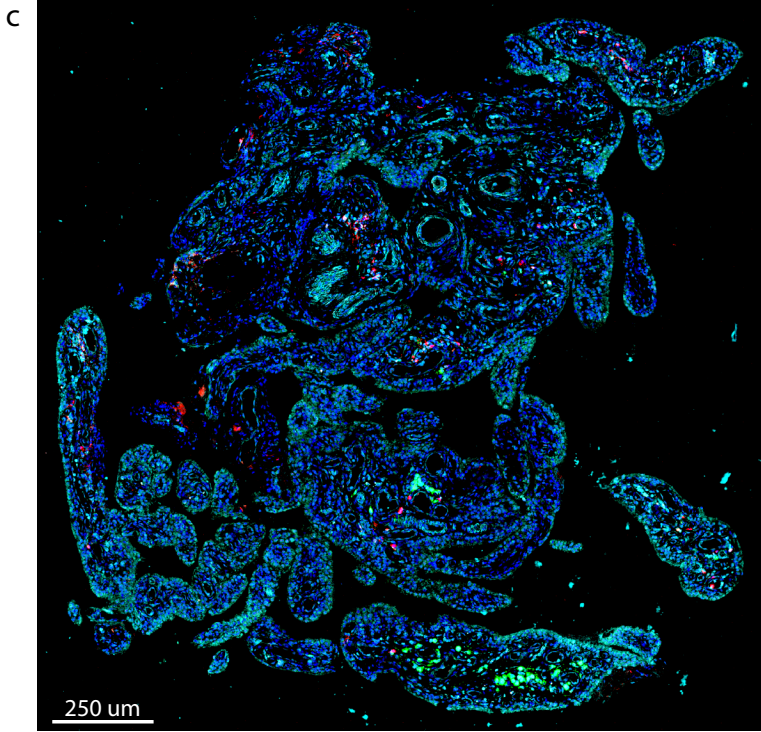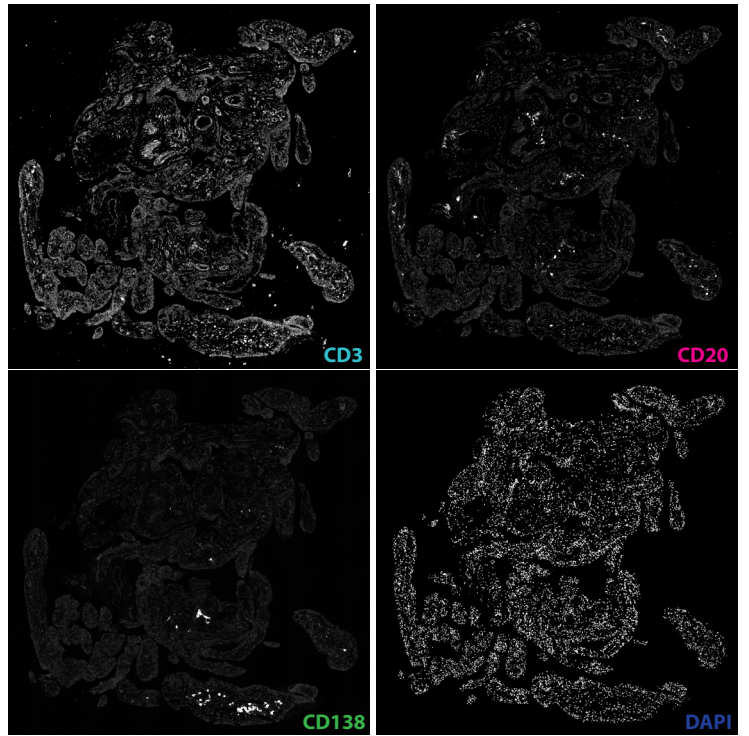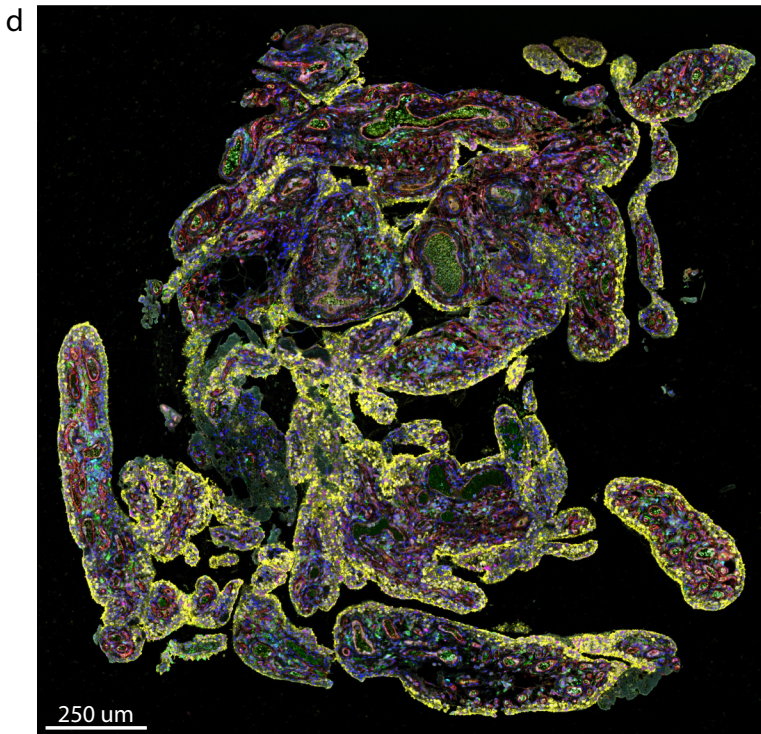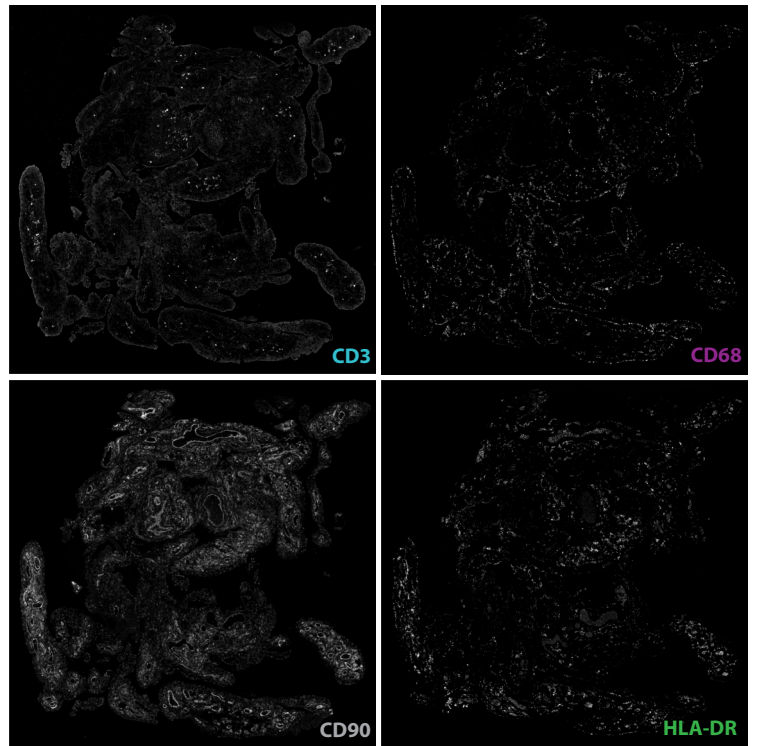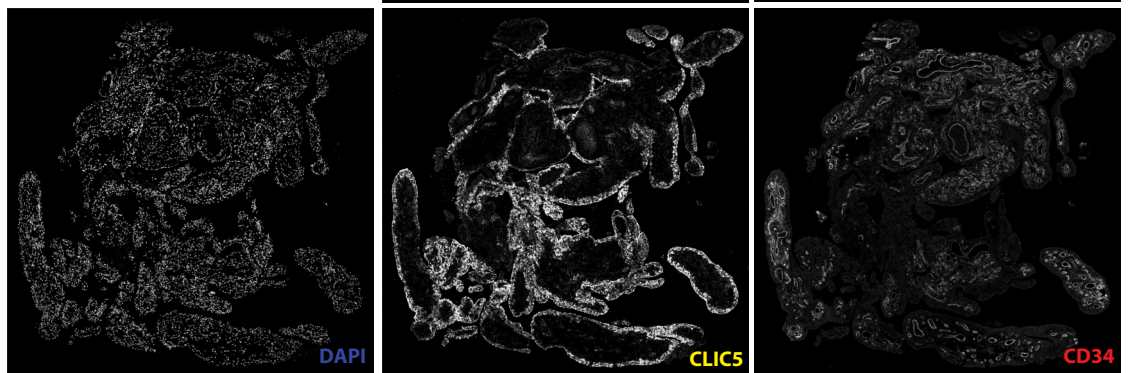

e

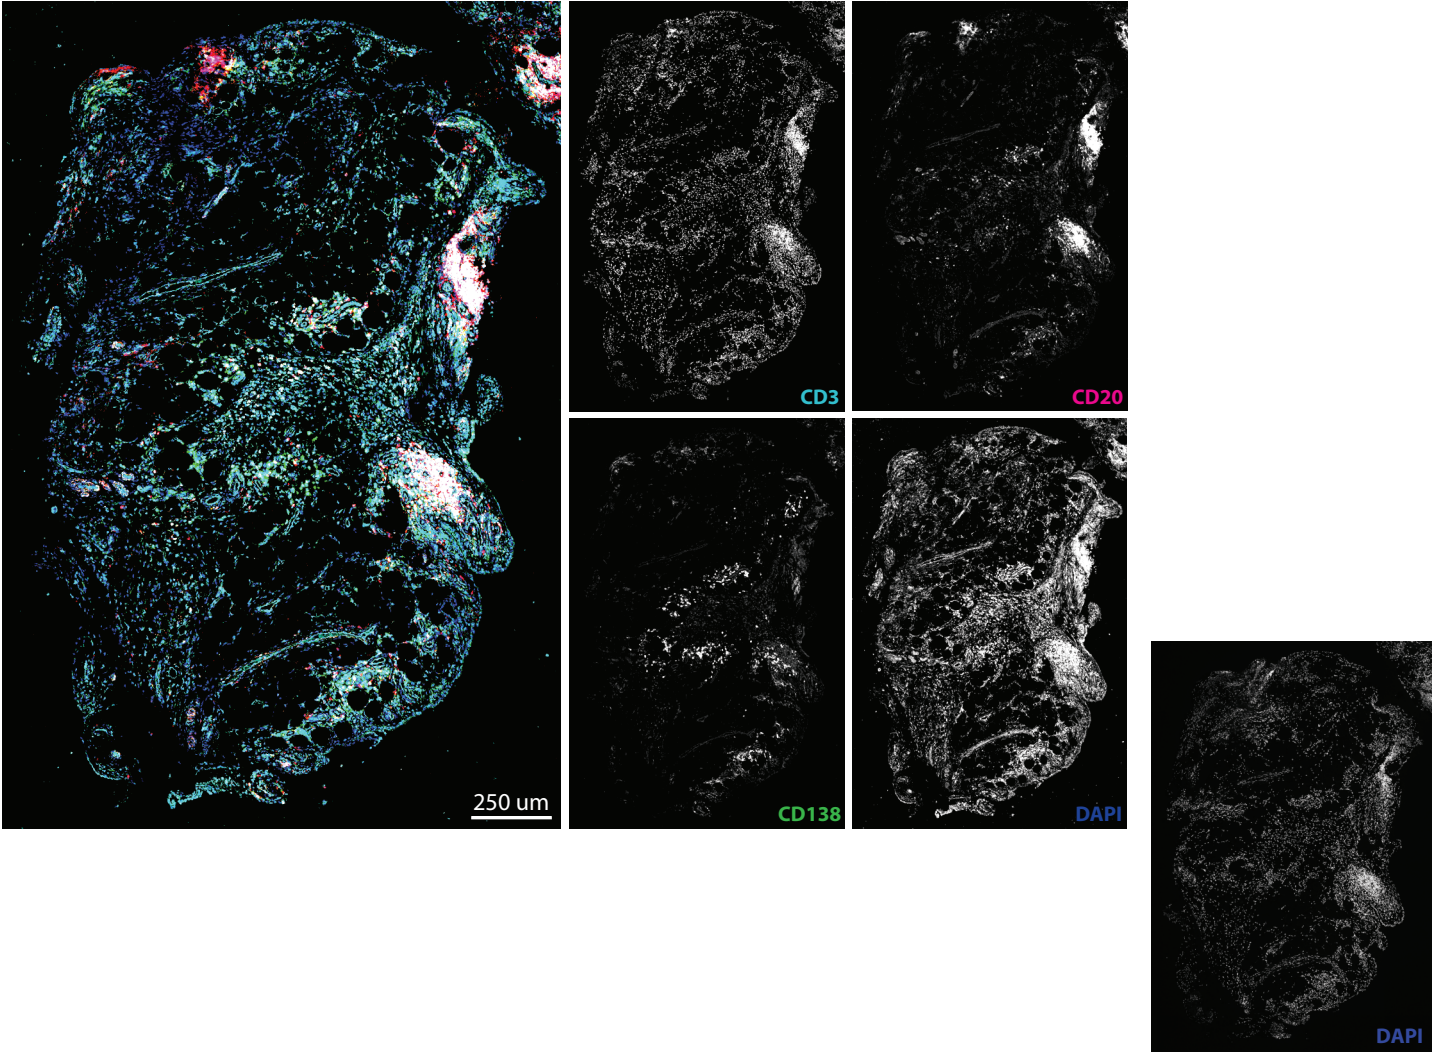

f

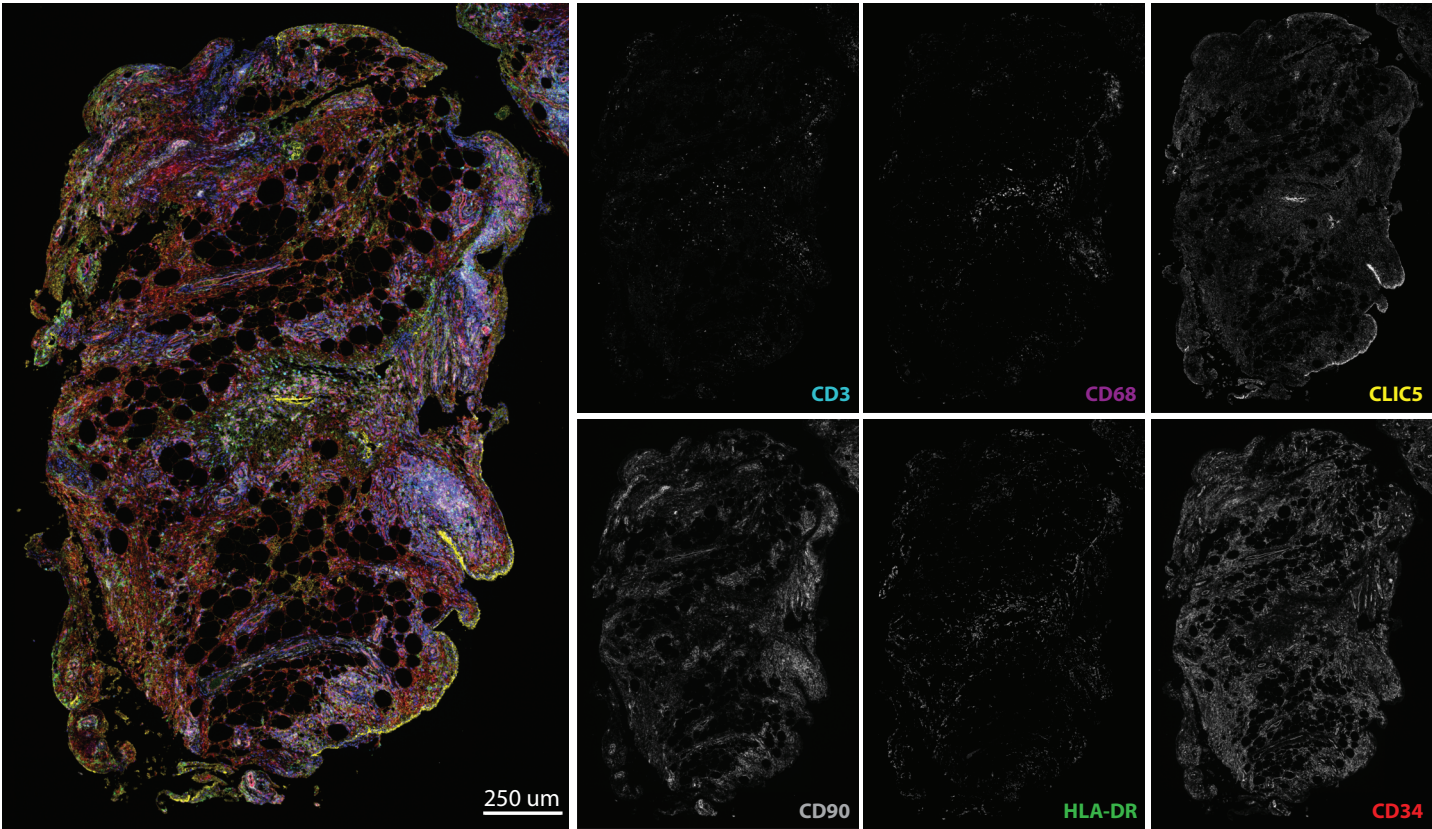

g

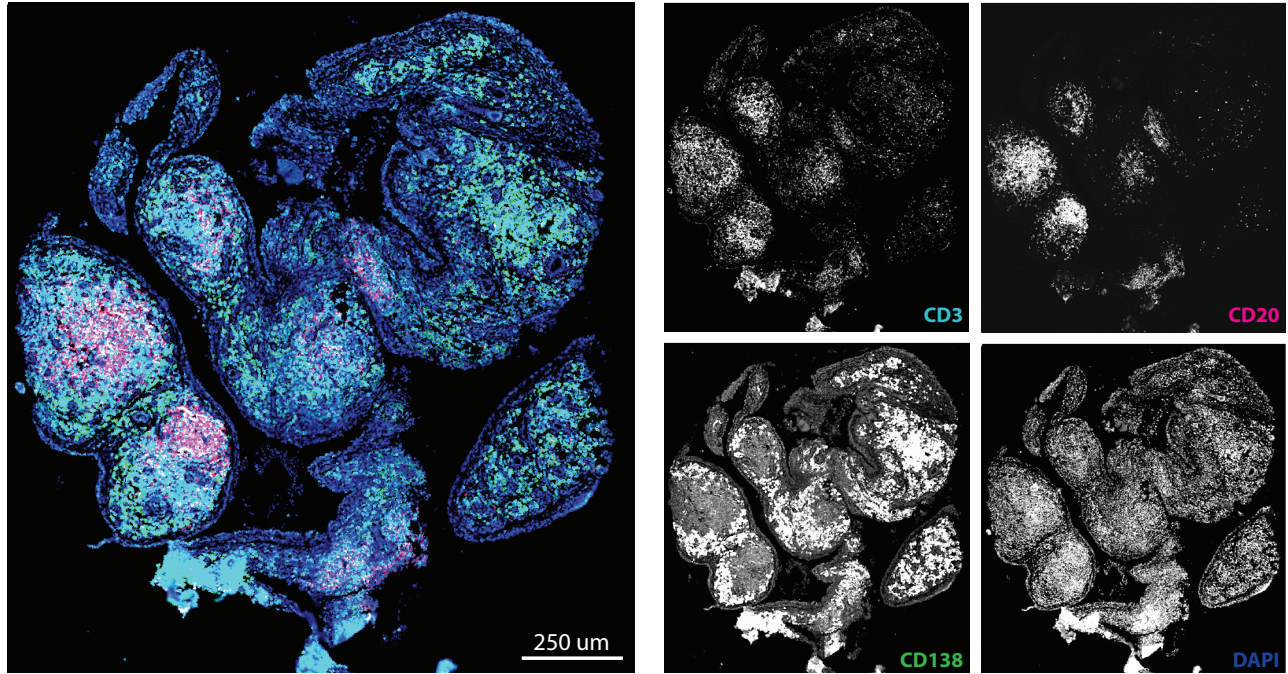

h

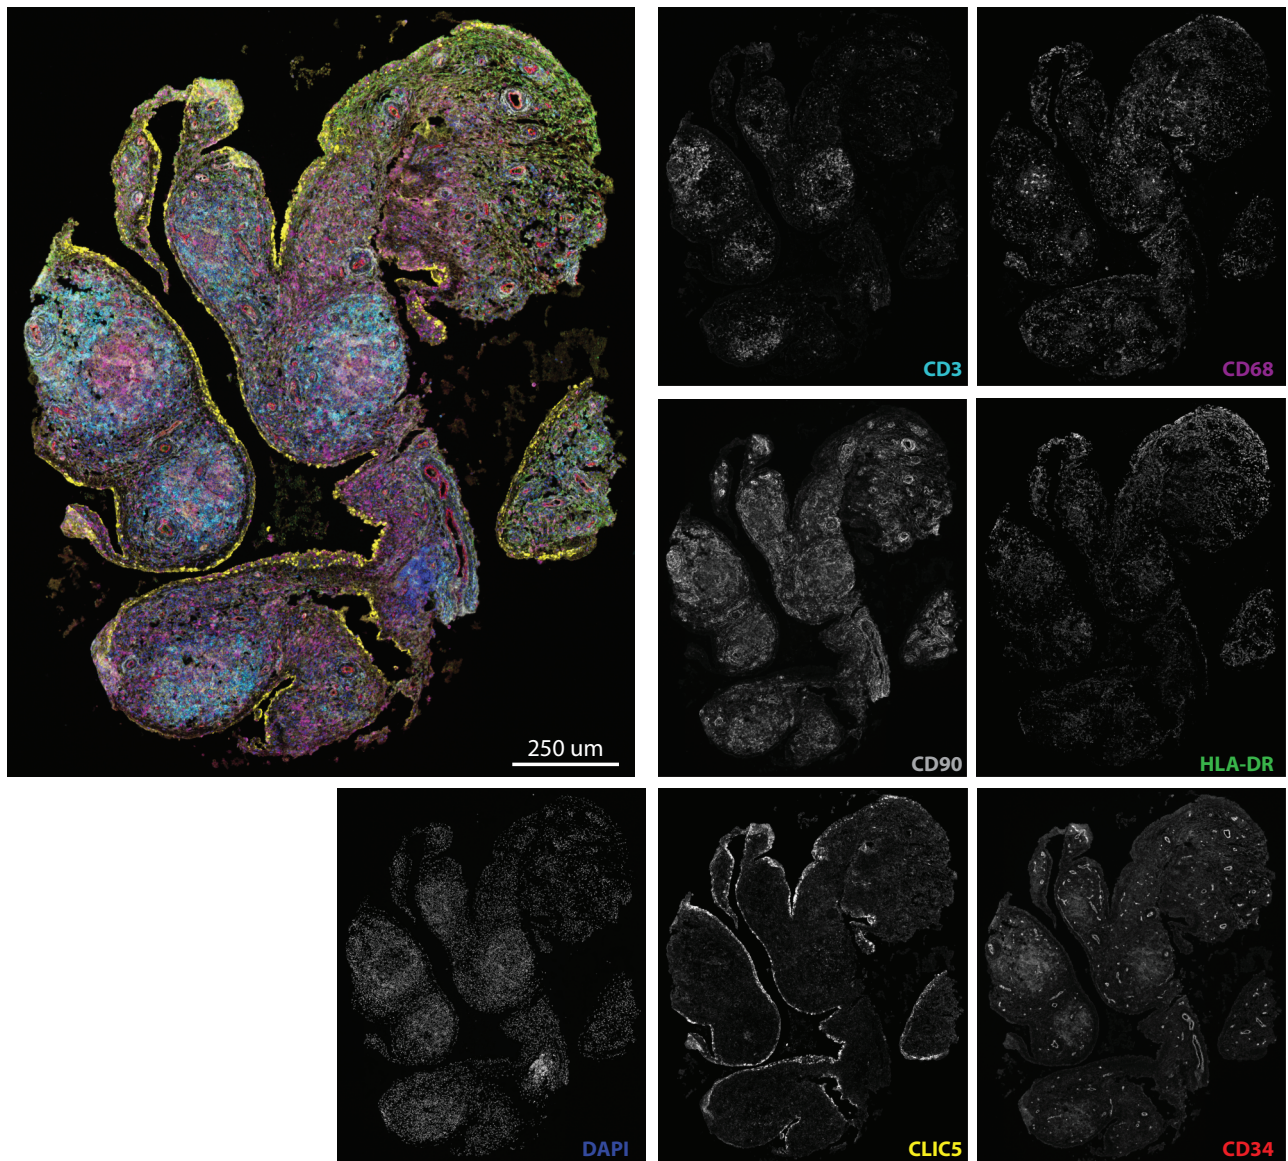

i

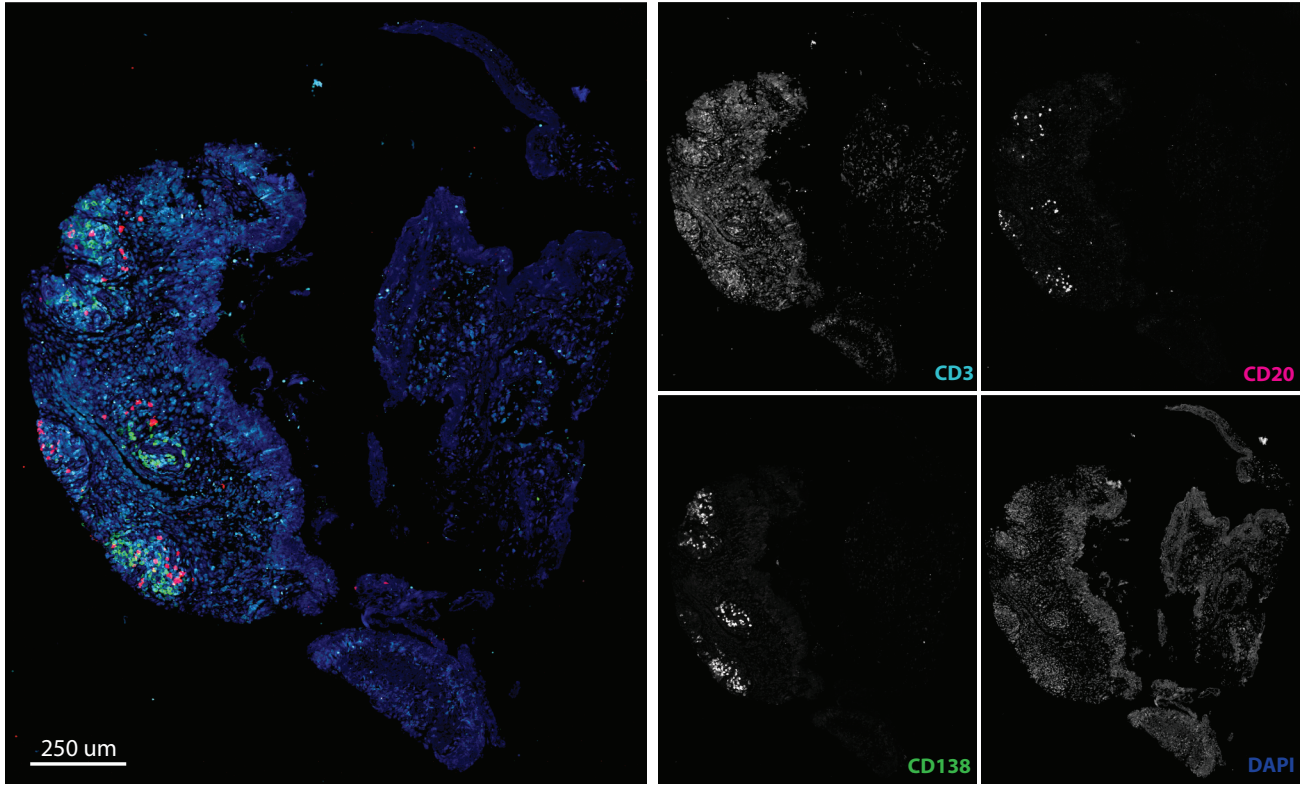

j

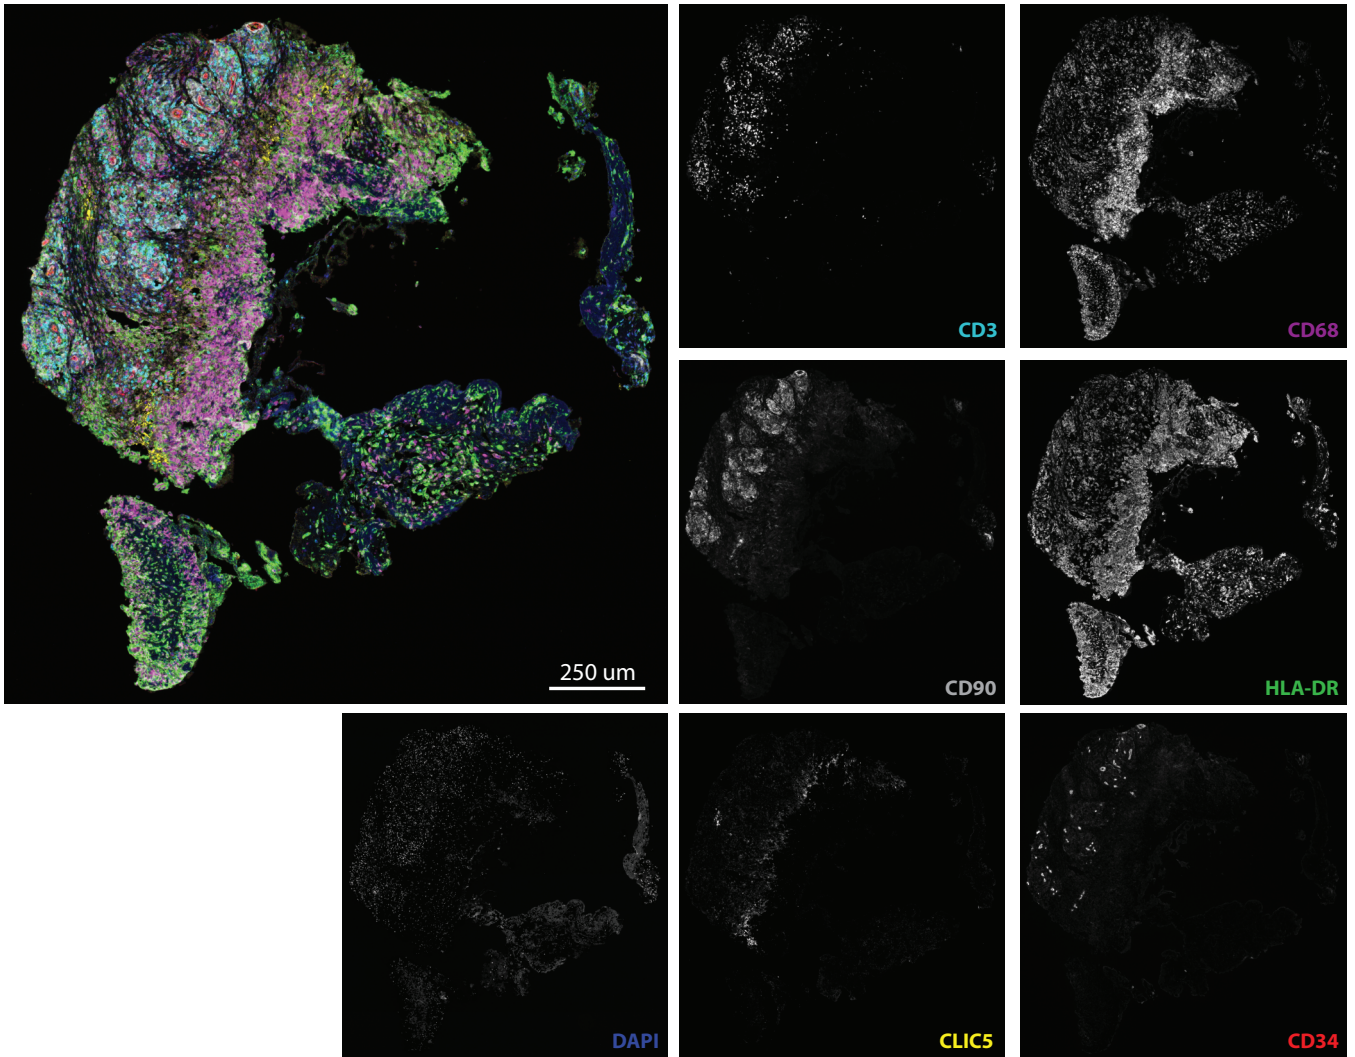

k

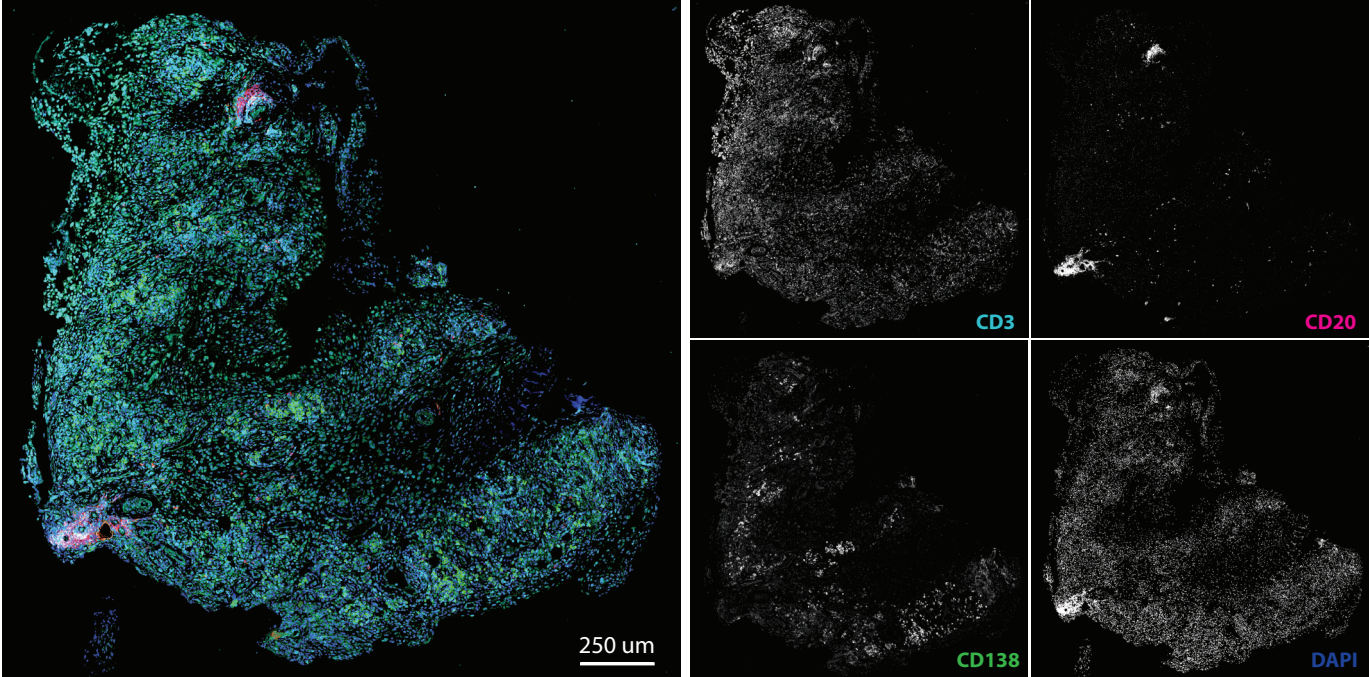

l

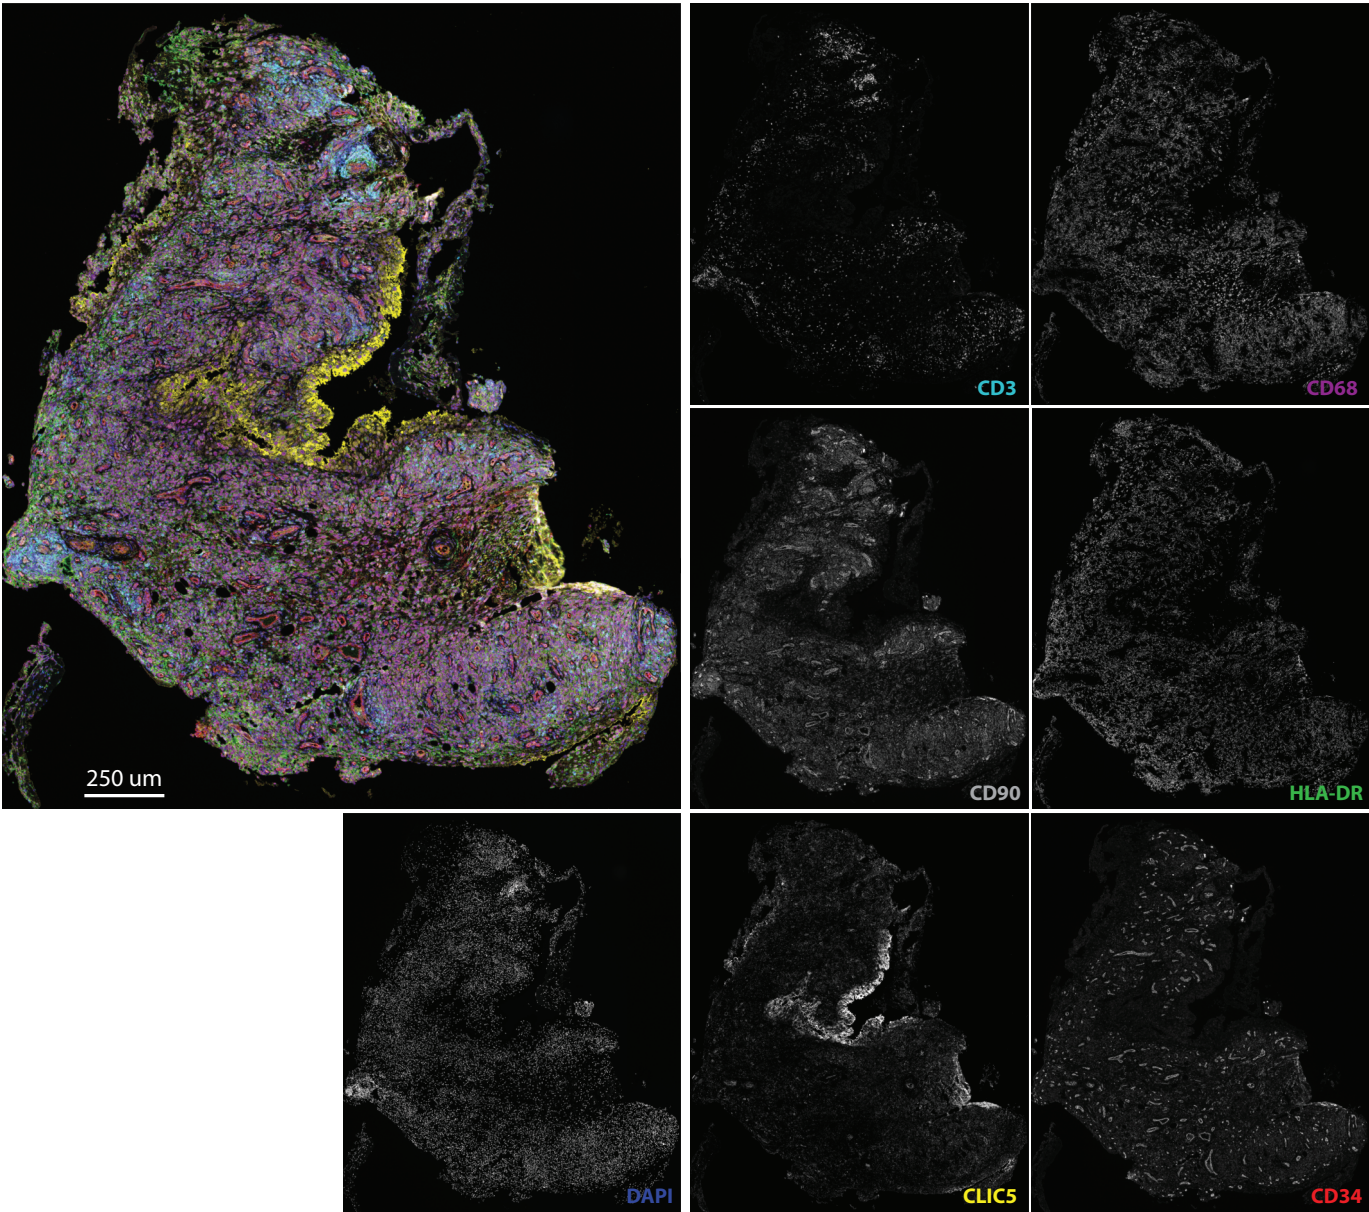

**Supplementary Fig. 4. Representative histology images for each CTAP.** Representative fragments from patients in each CTAP, showing composite and individual staining of each marker in the lymphocyte panel (**a, c, e, g, i, k**) or stromal cell panel (**b, d, f, h, j, l**). A total of 150 fragments from 36 individuals (mean 4.2 fragments per individual, range 2-9 fragments per individual) were stained in batches and analyzed as a single cohort. A high-resolution version of this figure is available at <https://doi.org/10.5281/zenodo.8364277>.
